# Supplementary material for: A Dual Repeat Cis-Element Determines Expression of GERANYL DIPHOSPHATE SYNTHASE for Monoterpene Production in Phalaenopsis Orchids
Source: PubMed Central journal article supplement (PMC5996158; doi:10.3389/fpls.2018.00765), 2018-06-05
Supplement: Data_Sheet_1.pdf [file Data_Sheet_1.pdf]

## Supplementary Material

### A dual repeat *cis*-element determines expression of *GERANYL DIPHOSPHATE SYNTHASE* for monoterpene production in *Phalaenopsis* orchids

Yu-Chen Chuang, Yi-Chu Hung, Chi-Yu Hsu, Chuan-Ming Yeh, Nobutaka Mitsuda, Masaru Ohme-Takagi, Wen-Chieh Tsai, Wen-Huei Chen, and Hong-Hwa Chen\*

\* Correspondence: Dr. Hong-Hwa Chen, hhchen@mail.ncku.edu.tw

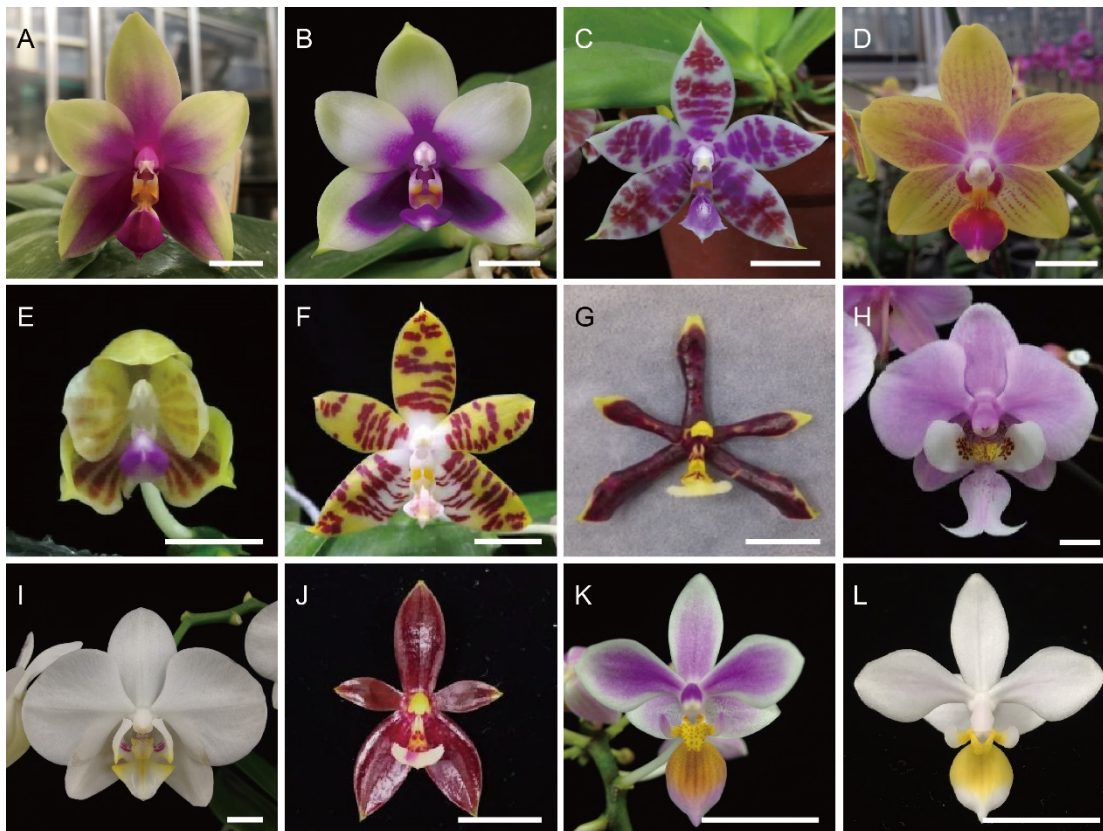

**Supplementary Figure 1.** The 12 *Phalaenopsis* orchids used in this study. The order of the figures followed the presentation in Fig. 2. (A) *P.* Meidarland Bellina Age 'LM128', (B) *P.* bellina, (C) *P.* lueddemanniana, (D) *P.* I-Hsin Venus, (E) *P.* javanica, (F) *P.* amboinensis var. yellow, (G) *P.* mannii, (H) *P.* schilleriana, (I) *P.* aphrodite subsp. formosana, (J) *P.* cornu-cervi var. red, (K) *P.* equestris 'RO-5', and (L) *P.* equestris 'WY-7'. Scale bar = 1 cm.

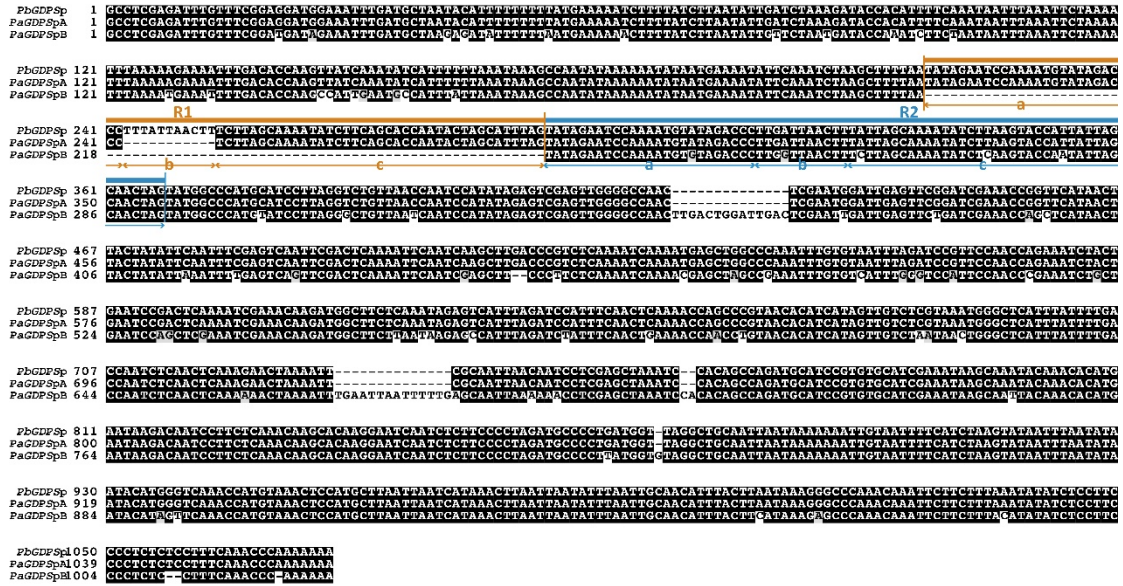

**Supplementary Figure 2.** The sequence alignment of *PbGDPsp*, *PaGDPspA* and *PaGDPspB*. The two units of the dual repeat are labeled with the thick color bars above the alignment, which orange indicates R1, and blue indicates R2. The subunits of R1 and R2 are labeled with the color lines under the alignment. The sequence alignment was generated by using Clustal Omega and displayed by using BOXSHADE.

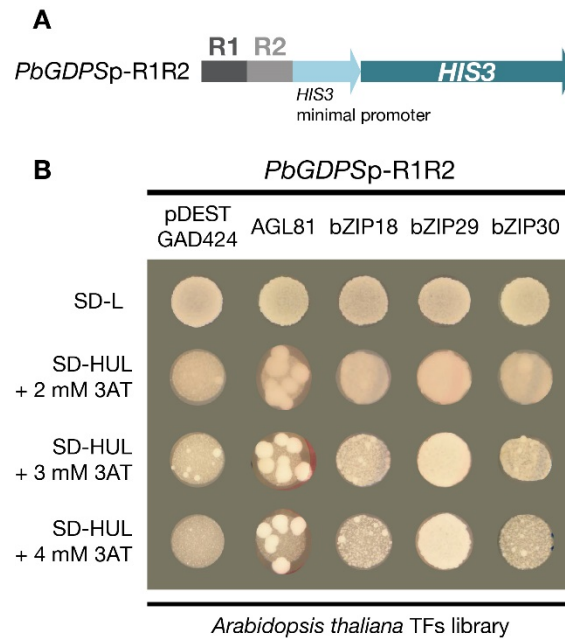

**Supplementary Figure 3.** The identification of TFs binding to the dual repeat of *PbGDPS* by Y1H screening. **(A)** The dual repeat of *PbGDPS* was used as a bait for isolating TFs binding to it. **(B)** The TFs binding to the dual repeat region of *PbGDPS* promoter were isolated by yeast one-hybrid screening using *Arabidopsis* TF-only library. SD-HUL indicated SD medium without histidine, uracil and leucine.

**Supplementary Table 1** Sources of the 12 *Phalaenopsis* orchids used in this study.

|         | <b>Name</b> (by alphabetical order)         | <b>Source</b> (Taiwan)     |
|---------|---------------------------------------------|----------------------------|
| Species | <i>P. amboinensis</i> var. <i>yellow</i>    | Tung-Hai Orchids           |
|         | <i>P. aphrodite</i> subsp. <i>formosana</i> | Taiwan Sugar Corp.         |
|         | <i>P. bellina</i>                           | Ming-Hui Orchids Nursery   |
|         | <i>P. cornu-cervi</i> var. <i>red</i>       | Mi-Tuo Orchids             |
|         | <i>P. equestris</i> 'RO-5'                  | Taiwan Sugar Corp.         |
|         | <i>P. equestris</i> 'WY-7'                  | Taiwan Sugar Corp.         |
|         | <i>P. javanica</i>                          | Mi-Tuo Orchids             |
|         | <i>P. lueddemanniana</i>                    | Mi-Tuo Orchids             |
|         | <i>P. mannii</i>                            | Ji An Guang Feng           |
|         | <i>P. schilleriana</i>                      | Han-Lin Orchids            |
| Hybrid  | <i>P. I-Hsin Venus</i>                      | I-Hsin Biotechnology Corp. |
|         | <i>P. Meidarland Bellina</i> Age 'LM128'    | Meidarland Orchids         |

**Supplementary Table 2** List of oligonucleotide primers used in this study.

| <b>Purpose</b>                                                     | Sequence (5' to 3')                      |                                |
|--------------------------------------------------------------------|------------------------------------------|--------------------------------|
| Target                                                             | Forward                                  | Reverse                        |
| <b>Detection of <i>GDPS</i> gene, promoter and dual-repeat</b>     |                                          |                                |
| Gene                                                               | ATGGCAGCAATCTTTCCTCAATCCCCTCCAATTT       | CGAGGGGAGGGGCGGTGCG            |
| Promoter                                                           | GCCTCGAGATTTGTTTCGG                      | CCATGGTTTTTTTTGGGTTTGAAAGGAGAG |
| Dual repeat                                                        | TGCTCGAGATTTGTTTCGGAGGATGGA              | ACCTAAGGATGCATGGGCCATACTAG     |
| <b>Real-time PCR</b>                                               |                                          |                                |
| <i>Actin1</i>                                                      | CCTCAAATCTCCCAAACCCTAA                   | CGATGCGGAGAGATAGGATTG          |
| <i>GDPS</i>                                                        | GCTGAGGGAGGCAAGGATAGAT                   | GCACCCAGCAGCATGAAGATC          |
| <i>bZIP4</i>                                                       | CACGCAGTTTTCCAACGGTAAAG                  | AACTCCCACCATGATTGGGAAGC        |
| <b>Transient assay construction</b>                                |                                          |                                |
| <i>PbGp-2010</i>                                                   | GGATCCGACACATGAAAATCATGTTTGAT            | CCATGGTTTTTTTTGGGTTTGAAAGGAGAG |
| <i>PbGp-1076</i>                                                   | GGATCCGCCTCGAGATTTGTTTCGG                | CCATGGTTTTTTTTGGGTTTGAAAGGAGAG |
| <i>PbGp-859</i>                                                    | GGATCCTATAGAATCCAAAATGTATAGACCCT         | CCATGGTTTTTTTTGGGTTTGAAAGGAGAG |
| <i>PbGp-836</i>                                                    | GGATCCCTTTATTAACCTTCTTAGCAAAAATATCTTCAGC | CCATGGTTTTTTTTGGGTTTGAAAGGAGAG |
| <i>PbGp-822</i>                                                    | GGATCCCTTAGCAAAAATATCTTCAGCA             | CCATGGTTTTTTTTGGGTTTGAAAGGAGAG |
| <i>PbGp-784</i>                                                    | GGATCCGAATCCAAAATGTATAGACCCTTG           | CCATGGTTTTTTTTGGGTTTGAAAGGAGAG |
| <i>PbGp-760</i>                                                    | GGATCCCTTGATTAACCTTTATTAGCAAAAATATCTTAA  | CCATGGTTTTTTTTGGGTTTGAAAGGAGAG |
| <i>PbGp-747</i>                                                    | GGATCCATTAGCAAAAATATCTTAAGTACCATTATTAG   | CCATGGTTTTTTTTGGGTTTGAAAGGAGAG |
| <i>PbGp-729</i>                                                    | GGATCCGTACCATTATTAGCAACTAGTATGGC         | CCATGGTTTTTTTTGGGTTTGAAAGGAGAG |
| <i>PbGp-710</i>                                                    | GGATCCGCCCATGCATCCTTAGGTCTGTAA           | CCATGGTTTTTTTTGGGTTTGAAAGGAGAG |
| <i>PbGp-584</i>                                                    | GGATCCGACTCAAAAATCAATCAAGCTT             | CCATGGTTTTTTTTGGGTTTGAAAGGAGAG |
| <i>PbGp-410</i>                                                    | GGATCCACATCATAGTTGTCTCGTAAATGGGCTC       | CCATGGTTTTTTTTGGGTTTGAAAGGAGAG |
| <i>PbGp-354</i>                                                    | GGATCCGAACTAAAATTCGCAATTAACAATCCCCG      | CCATGGTTTTTTTTGGGTTTGAAAGGAGAG |
| <i>PbGp-297</i>                                                    | GGATCCGTGCATCGAAATAAGCAAATAC             | CCATGGTTTTTTTTGGGTTTGAAAGGAGAG |
| <i>PbGp-216</i>                                                    | GGATCCGATGCCCTGATGGTTAGGCTGC             | CCATGGTTTTTTTTGGGTTTGAAAGGAGAG |
| <b>Yeast one hybrid</b>                                            |                                          |                                |
| Dual repeat                                                        | CCCGGGTATAGAATCCAAAATGTATAGACC           | TCTAGACTAGTTGCTAATAATGGTACTTAA |
| <b>Transactivation assay of <i>PbbZIP4</i> and <i>PbbZIP26</i></b> |                                          |                                |
| <i>PbGDPSp</i>                                                     | GGATCCGCCTCGAGATTTGTTTCGG                | CCATGGTTTTTTTTGGGTTTGAAAGGAGAG |
| <i>PaGDPSpA</i>                                                    | GGATCCGCCTCGAGATTTGTTTCGG                | CCATGGTTTTTTTTGGGTTTGAAAGGAGAG |
| <i>PaGDPSpB</i>                                                    | GGATCCGCCTCGAGATTTGTTTCGG                | CCATGGTTTTTTTTGGGTTTGAAAGGAGAG |
| <i>PbbZIP4</i>                                                     | TCTAGAATGGACGCGAATCGGCCGA                | CCCGGGTCACATAAAACTCCCACCATG    |
| <i>PbbZIP26</i>                                                    | TCTAGAATGCAGACGAATTCATAGATCCATC          | TCTAGATCAGAAAGTTGCTGCTGCTCTCA  |

**Supplementary Table 3** Floral volatiles of 12 *Phalaenopsis* orchids.

| ng/flower/hr \ Species        | P.Meidarland<br>Bellina Age | <i>P. bellina</i> | <i>P. lueddemanniana</i> | P. I-Hsin<br>Venus | <i>P. javanica</i> | <i>P. amboinensis</i> | <i>P. mannii</i> | <i>P. schilleriana</i> | <i>P. aphrodite</i> | <i>P. cornucervi</i> | <i>P. equestris</i><br>'RO-5' | <i>P. equestris</i><br>'WY-7' |
|-------------------------------|-----------------------------|-------------------|--------------------------|--------------------|--------------------|-----------------------|------------------|------------------------|---------------------|----------------------|-------------------------------|-------------------------------|
| <b>Monoterpenoids</b>         |                             |                   |                          |                    |                    |                       |                  |                        |                     |                      |                               |                               |
| Eucalyptol                    | — <sup>g</sup>              | —                 | —                        | 65.77              | —                  | —                     | —                | —                      | —                   | —                    | —                             | —                             |
| Geraniol <sup>a</sup>         | 556.97                      | 2591.41           | 723.04                   | —                  | —                  | —                     | —                | —                      | —                   | —                    | —                             | —                             |
| Limonene                      | —                           | 16.77             | —                        | —                  | —                  | —                     | —                | —                      | —                   | —                    | —                             | —                             |
| Linalool <sup>b</sup>         | 3003.40                     | 946.55            | —                        | 559.59             | —                  | —                     | —                | —                      | —                   | —                    | —                             | —                             |
| Myrcene                       | —                           | 321.48            | —                        | —                  | —                  | —                     | —                | —                      | —                   | —                    | —                             | —                             |
| Neral                         | 101.19                      | 21.30             | 12.31                    | —                  | —                  | —                     | —                | —                      | —                   | —                    | —                             | —                             |
| Ocimene <sup>c</sup>          | —                           | 231.47            | —                        | —                  | —                  | —                     | —                | —                      | —                   | —                    | —                             | —                             |
| α-Terpineol                   | 68.33                       | —                 | —                        | —                  | —                  | —                     | —                | —                      | —                   | —                    | —                             | —                             |
| <b>Sesquiterpenoids</b>       |                             |                   |                          |                    |                    |                       |                  |                        |                     |                      |                               |                               |
| α-Amorphene                   | —                           | —                 | —                        | —                  | 45.29              | —                     | —                | —                      | —                   | —                    | —                             | —                             |
| γ-Cadinene                    | —                           | —                 | —                        | —                  | —                  | 21.24                 | —                | —                      | —                   | —                    | —                             | —                             |
| Farnesene <sup>d</sup>        | 284.01                      | —                 | —                        | —                  | —                  | —                     | —                | —                      | —                   | —                    | —                             | —                             |
| Murolene <sup>e</sup>         | —                           | —                 | —                        | —                  | —                  | 19.72                 | —                | —                      | —                   | —                    | —                             | —                             |
| <b>Benzenoids</b>             |                             |                   |                          |                    |                    |                       |                  |                        |                     |                      |                               |                               |
| Benzaldehyde                  | 179.42                      | —                 | —                        | 66.35              | 15.78              | 36.19                 | 6.09             | 8.57                   | —                   | —                    | —                             | —                             |
| <b>Phenylpropanoid</b>        |                             |                   |                          |                    |                    |                       |                  |                        |                     |                      |                               |                               |
| Cinnamaldehyde <sup>f</sup>   | 78.23                       | —                 | —                        | —                  | —                  | —                     | 68.00            | —                      | —                   | —                    | —                             | —                             |
| <b>Fatty acid derivatives</b> |                             |                   |                          |                    |                    |                       |                  |                        |                     |                      |                               |                               |
| methyl-Myristate              | —                           | —                 | —                        | —                  | —                  | —                     | 76.19            | —                      | —                   | —                    | —                             | —                             |

a: Include both geraniol and granial.

b: Include linalool and linalool oxide.

c: Include (*E*)-β-ocimene, (*Z*)-β-ocimene, and allo-ocimene.

d: Include (*E,E*)- $\alpha$ -farnesene, farnesol, farnesal, and hexa-hydro-farnesol.

e: Include T-muurolol and  $\gamma$ -muurolene

f: Include (*E*)-cinnamaldehyde and cinnamyl acetate

g: This compound was not identified.

**Supplementary Table 4** The classification of the 10 native *Phalaenopsis* species used in this study.

| Taxa and systematic classification <sup>a</sup> | Geographical distribution <sup>b</sup>                     |
|-------------------------------------------------|------------------------------------------------------------|
| <b>Subgenus <i>Polychilos</i></b>               |                                                            |
| <b>Section <i>Polychilos</i></b>                |                                                            |
| <i>P. cornu-cervi</i>                           | Northeast India and the Nicobar Islands to Java and Borneo |
| <i>P. manni</i>                                 | Northeast India, Nepal and China to Vietnam                |
| <b>Section <i>Amboinenses</i></b>               |                                                            |
| <i>P. amboinensis</i>                           | Indonesia                                                  |
| <i>P. bellina</i>                               | Malaysia                                                   |
| <i>P. javanica</i>                              | Endemic to Indonesia (Java)                                |
| <i>P. lueddemanniana</i>                        | Endemic to Philippines                                     |
| <br>                                            |                                                            |
| <b>Subgenus <i>Phalaenopsis</i></b>             |                                                            |
| <b>Section <i>Phalaenopsis</i></b>              |                                                            |
| <i>P. aphrodite</i>                             | Southeastern Taiwan                                        |
| <i>P. schilleriana</i>                          | Endemic to Philippines                                     |
| <b>Section <i>Esmeralda</i></b>                 |                                                            |
| <i>P. equestris</i>                             | Southeastern Taiwan                                        |

a: This classifications is based on Christenson (2001).

b: This geographical distribution is based on Tsai (2011).

This table is revised from Molecular phylogeny and biogeography of *Phalaenopsis* species. Tsai, C. C. Chen, W. H. and Chen H. H., eds. Copyright @ 2011 Singapore, World Scientific.
